# Supplementary material
Source: PubMed Central journal article supplement (PMC1184258)

**Table A : Characteristics of articles in sample**

*1. Topics covered (major focus of article)*

|                             |    |       |
|-----------------------------|----|-------|
| a. Organ retention scandals | 83 | (68%) |
| Alder Hey                   | 53 | (43%) |
| Regulatory moves            | 26 | (21%) |
| Thymus glands               | 9  | (7%)  |
| Other hospitals             | 5  | (4%)  |
| Body Worlds exhibition      | 4  | (3%)  |
| Bristol Royal Infirmary     | 3  | (2%)  |
| b. Other topics             | 39 | (32%) |
| Designer babies             | 11 | (9%)  |
| Bone marrow donation        | 4  | (3%)  |

*2. Occurrence of keywords (at least one in an article)*

|                              |    |       |
|------------------------------|----|-------|
| 'Alder Hey'                  | 77 | (63%) |
| 'Bristol Royal Infirmary'    | 18 | (15%) |
| 'Redfern' inquiry report (2) | 12 | (10%) |
| 'Kennedy' inquiry report (3) | 4  | (3%)  |

*3. Type of paper*

|                       |            |               |
|-----------------------|------------|---------------|
| Broadsheet            | 86         | (70%)         |
| Tabloid               | 36         | (30%)         |
| <b>TOTAL ARTICLES</b> | <b>122</b> | <b>(100%)</b> |

**Table B. Distributions of character counts among tabloid and broadsheet articles reporting of harms and benefits**

|             | Character count:                                      |                       | rank-sum test*: P<br>value |
|-------------|-------------------------------------------------------|-----------------------|----------------------------|
|             | median (25 <sup>th</sup> , 75 <sup>th</sup> centiles) |                       |                            |
|             | Tabloid n=36                                          | Broadsheet n=86       |                            |
| Direct harm | 258.5 (0, 762)                                        | 0 (0, 324.3)          | 0.0092                     |
| Benefit     | 116.0 (0, 627.5)                                      | 232.0 (0, 553.0)      | 0.47                       |
| System harm | 0 (0, 331)                                            | 0 (0, 219.5)          | 0.92                       |
| Total       | 990.0 (429.8, 1606.8)                                 | 665.0 (298.3, 1268.0) | 0.068                      |

\* two-sample Wilcoxon rank-sum (Mann-Whitney) test for difference in character count for between tabloid and broadsheet papers in each category.

**Table C Benefits described by sources**

|                                 | SOURCE  |     |            |       | Total |
|---------------------------------|---------|-----|------------|-------|-------|
|                                 | Medical | Lay | Government | Other |       |
| Purely therapy                  | 15      | 14  | 2          | 13    | 44    |
| Purely research                 | 9       | 2   | 2          | 4     | 17    |
| Research to<br>create therapies | 10      | 0   | 0          | 5     | 15    |
| Educational                     | 5       | 1   | 0          | 0     | 6     |
| Other                           | 3       | 0   | 1          | 2     | 6     |
| Total                           | 42      | 17  | 5          | 24    | 88    |

WebExtra Figure A

Figure 2. UKCCSG Tumour Bank Registrations and Newspaper Coverage in the Previous Time Period

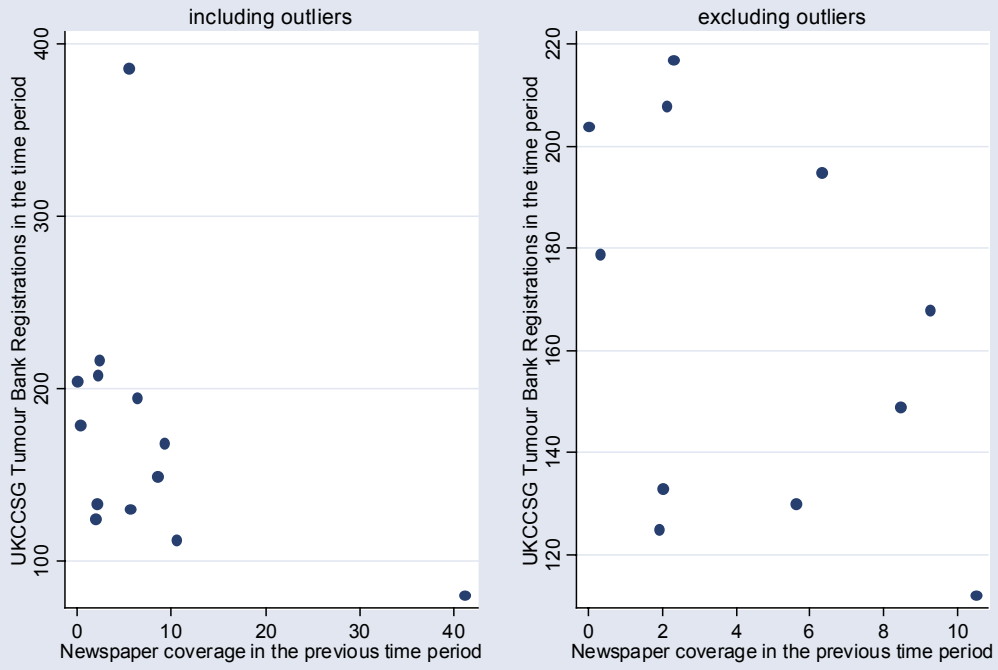

Supplement: bmj_331_7513_401__1.pdf [file bmj_331_7513_401__1.pdf]
